# Supplementary material
Source: PubMed Central journal article supplement (PMC7904640)
Supplement: NIHMS1649402-supplement-2.pdf [file NIHMS1649402-supplement-2.pdf]

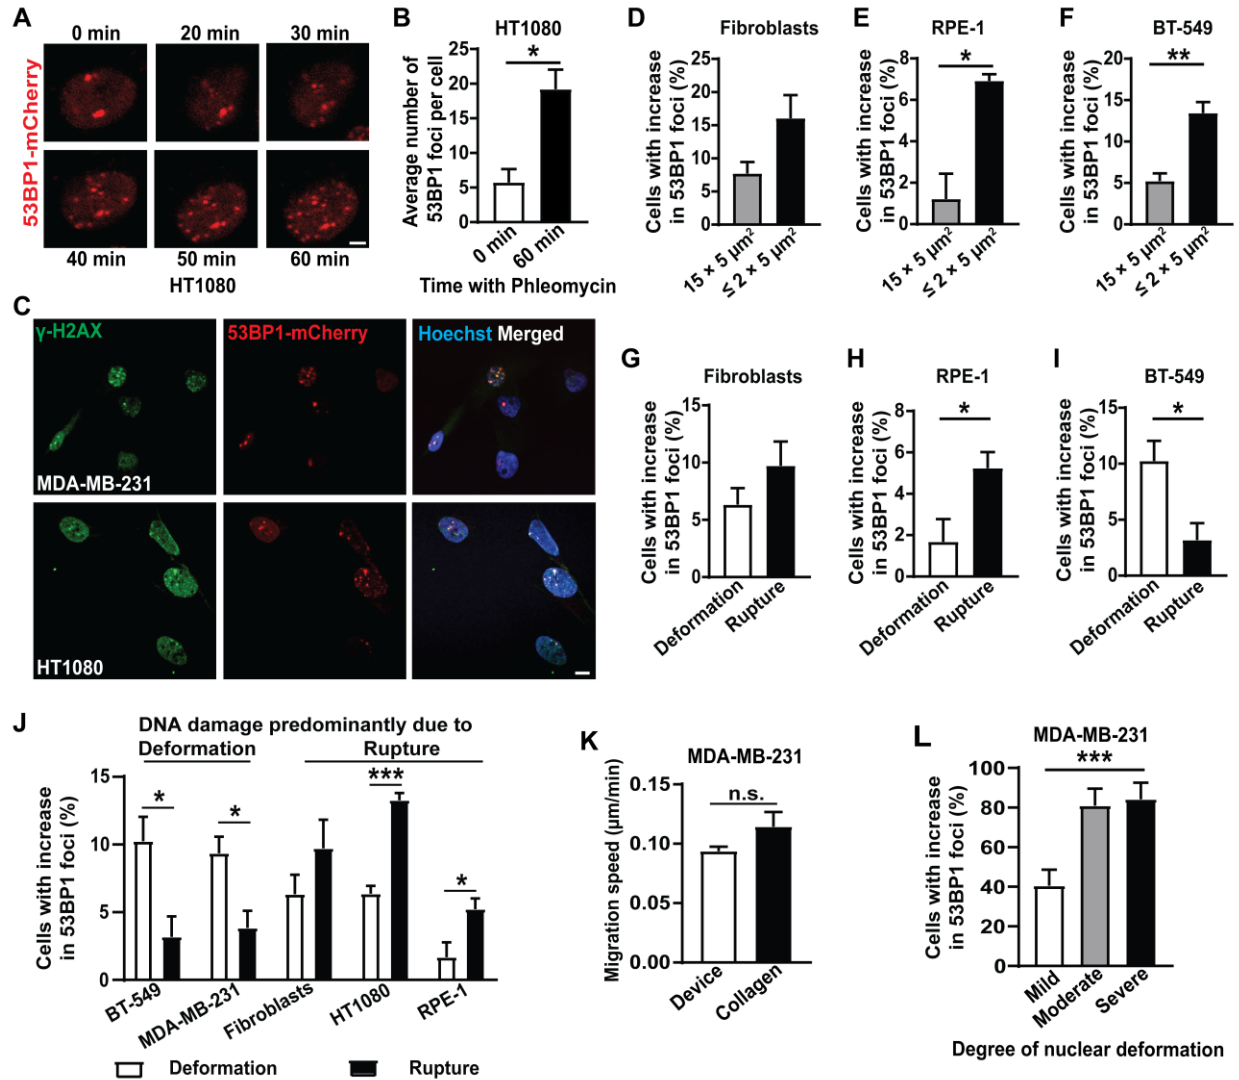

**Figure S1: 53BP1-mCherry construct validation and DNA damage due to migration through confined spaces. Related to Figure 1. (A)** Representative image sequence of a HT1080 fibrosarcoma cell expressing 53BP1-mCherry treated with Phleomycin, showing increasing number of 53BP1-mCherry foci over time, indicating increasing DNA damage. Scale bar: 5  $\mu$ m **(B)** Percentage of HT1080 cells with new DNA damage (53BP1-mCherry foci) before Phleomycin treatment and after 60 minutes of Phleomycin treatment.  $n = 86$  cells; \*,  $p < 0.05$  based on unpaired  $t$ -test with Welch's correction. **(C)** Representative image panel showing co-localization between  $\gamma$ -H2AX foci and 53BP1-mCherry foci in MDA-MB-231 and HT1080 cells. Scale bar: 10  $\mu$ m **(D)** Percentage of human fibroblast cells with new DNA damage (53BP1-mCherry foci) during migration through small ( $\leq 2 \times 5 \mu\text{m}^2$ ) constrictions ( $n = 230$  cells) or  $15 \times 5 \mu\text{m}^2$  control channels ( $n = 135$  cells). **(E)** Percentage of RPE-1 retinal epithelial cells with new DNA damage (53BP1-mCherry foci) during migration through small ( $\leq 2 \times 5 \mu\text{m}^2$ ) constrictions ( $n = 407$  cells) or  $15 \times 5 \mu\text{m}^2$  control channels ( $n = 259$  cells). \*,  $p < 0.05$  based on unpaired  $t$ -test with Welch's correction. **(F)** Percentage of BT-549 breast cancer cells with new DNA damage (53BP1-mCherry foci) during migration through small ( $\leq 2 \times 5 \mu\text{m}^2$ ) constrictions ( $n = 555$  cells) or  $15 \times 5$

$\mu\text{m}^2$  control channels ( $n = 260$  cells). \*\*,  $p < 0.01$  based on unpaired  $t$ -test with Welch's correction. **(G)** Percentage of human fibroblasts cells in which new DNA damage during migration through  $\leq 2 \times 5 \mu\text{m}^2$  constrictions was associated with either NE rupture or with nuclear deformation in the absence of NE rupture.  $n = 230$  cells **(H)** Percentage of RPE-1 cells in which new DNA damage during migration through  $\leq 2 \times 5 \mu\text{m}^2$  constrictions was associated with either NE rupture or with nuclear deformation in the absence of NE rupture.  $n = 407$  cells; \*,  $p < 0.05$  based on unpaired  $t$ -test with Welch's correction. **(I)** Percentage of BT-549 cells in which new DNA damage during migration through  $\leq 2 \times 5 \mu\text{m}^2$  constrictions was associated with either NE rupture or with nuclear deformation in the absence of NE rupture.  $n = 555$  cells; \*,  $p < 0.05$  based on unpaired  $t$ -test with Welch's correction. **(J)** Percentage of cells in which new DNA damage during migration through  $\leq 2 \times 5 \mu\text{m}^2$  constrictions was associated with either NE rupture (Rupture) or with nuclear deformation in the absence of NE rupture (Deformation), for a panel of cell lines. The results correspond to the data presented in Fig. 1C and 1F, and Suppl. Fig. S1G-I. \*,  $p < 0.05$ ; \*\*\*,  $p < 0.001$  based on unpaired  $t$ -test with Welch's correction. **(K)** Migration speed of MDA-MB-231 cells during migration through  $\leq 2 \times 5 \mu\text{m}^2$  constrictions in the microfluidic device ( $n = 537$  cells) and collagen matrices (1.7 mg/ml of collagen;  $n = 27$  cells). Differences were not statistically significant based on Chi-square test. **(L)** Percentage of MDA-MB-231 breast cancer cells with new DNA damage (53BP1-mCherry foci) due to mild ( $n = 37$  cells), moderate ( $n = 21$  cells), or severe ( $n = 19$  cells) nuclear deformation during migration through a collagen matrix (1.7 mg/ml). \*\*\*,  $p < 0.001$  based on Chi-square test. Data in this figure are presented as mean + S.E.M.

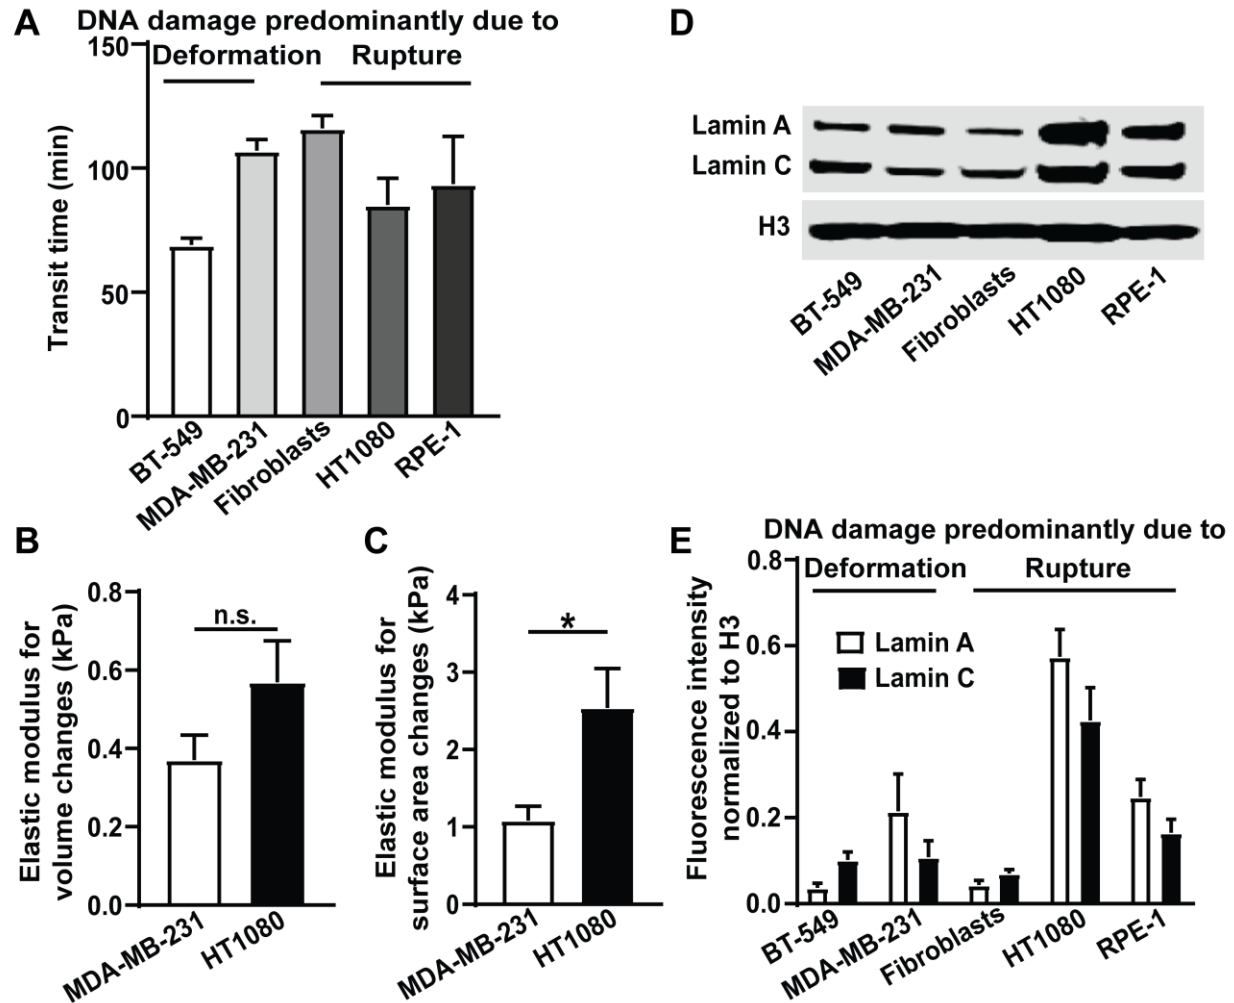

**Figure S2: Transit time, nuclear deformability, and lamin A/C level analysis in a panel of cell lines. Related to Figure 1. (A)** Transit time for BT-549 ( $n = 444$  cells), MDA-MB-231 ( $n = 381$  cells), human fibroblasts ( $n = 125$  cells), HT1080 ( $n = 326$  cells), and RPE-1 ( $n = 269$  cells) cells to migrate through  $\leq 2 \times 5 \mu\text{m}^2$  constrictions in the microfluidic device. **(B)** Elastic modulus for MDA-MB-231 ( $n = 17$  cells) and HT1080 ( $n = 15$  cells) cells for bulk nuclear deformation by a beaded AFM tip. Differences were not statistically significant based on unpaired  $t$ -test with Welch's correction. **(C)** Elastic modulus for nuclear surface area deformation for MDA-MB-231 ( $n = 17$  cells) and HT1080 ( $n = 15$  cells) cells probed with a beaded AFM tip. \*,  $p < 0.05$  based on unpaired  $t$ -test with Welch's correction. **(D)** Representative western blot of lamin A and C levels in a panel of human cell lines. Histone H3 was used as a loading control. **(E)** Quantification of lamin A and C levels based on  $N = 3$  western blot experiments. Data in this figure are presented as mean + S.E.M.

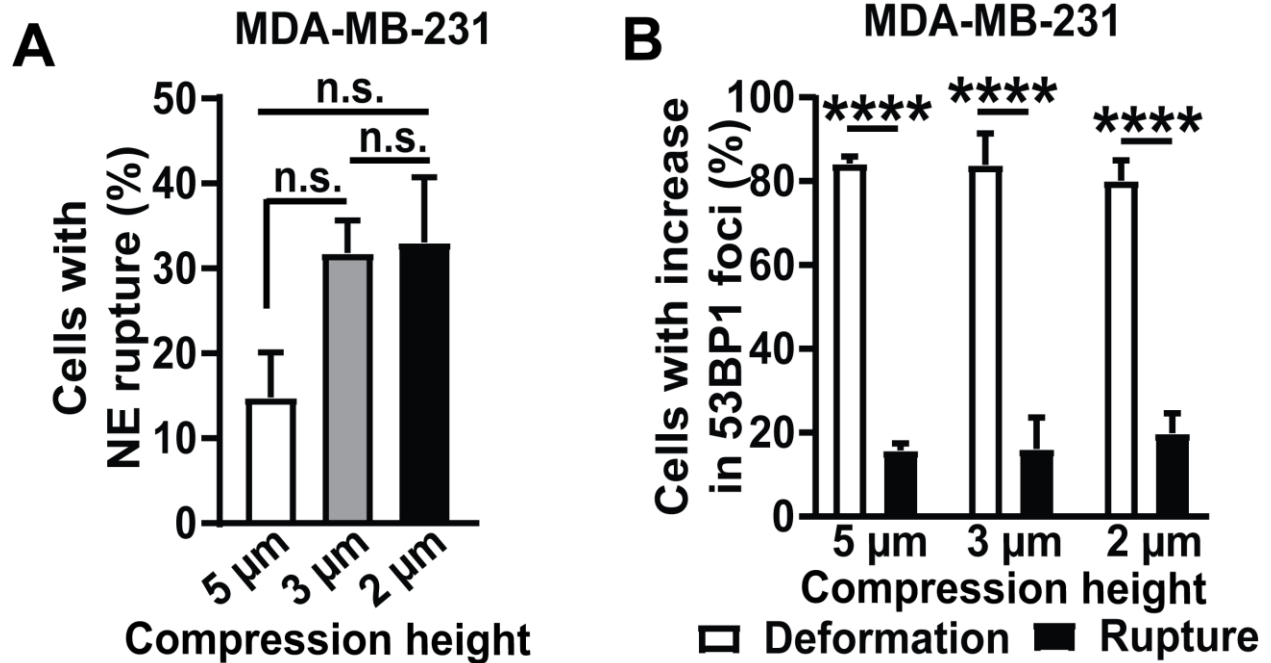

**Figure S3: Cell compression causes NE rupture and DNA damage. Related to Figure 2. (A)** Percentage of MDA-MB-231 cells that experience NE rupture during external compression to 5  $\mu$ m height ( $n = 500$  cells), 3  $\mu$ m height ( $n = 378$  cells), or 2  $\mu$ m height ( $n = 411$  cells). Differences were not statistically significant based on one-way ANOVA with Dunnett's multiple comparison test. **(B)** Percentage of MDA-MB-231 cells in which new DNA damage during compression to 5  $\mu$ m, 3  $\mu$ m, or 2  $\mu$ m height was associated with either NE rupture or with nuclear deformation without NE rupture. \*\*\*\*,  $p < 0.0001$  based on two-way ANOVA with Tukey's multiple comparison test. Data in this figure are presented as mean + S.E.M.

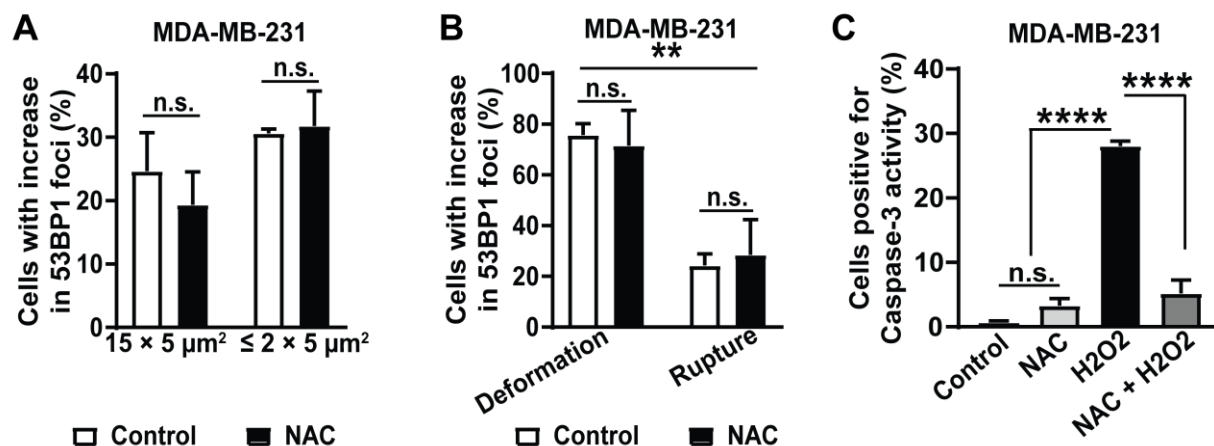

**Figure S4: NAC treatment does not rescue DNA damage. Related to Figure 1,2. (A)** Percentage of MDA-MB-231 cells treated with or without NAC that exhibit new DNA damage (53BP1-mCherry foci) during migration through small ( $\leq 2 \times 5 \mu\text{m}^2$ ) constrictions ( $n = 181$  cells for vehicle control;  $n = 182$  cells for NAC treatment) or  $15 \times 5 \mu\text{m}^2$  control channels ( $n = 95$  cells for vehicle control;  $n = 83$  for NAC treatment). Differences were not statistically significant based on two-way ANOVA with Tukey's multiple comparison test. **(B)** Percentage of MDA-MB-231 cells treated with or without NAC in which new DNA damage during migration through small ( $\leq 2 \times 5 \mu\text{m}^2$ ) constrictions was associated with either NE rupture or with nuclear deformation in the absence of NE rupture. \*\*,  $p < 0.01$  based on two-way ANOVA with Tukey's multiple comparison test. **(C)** Percentage of MDA-MB-231 cells undergoing apoptosis (positive for Caspase-3 activity) after 24 hours of NAC, H<sub>2</sub>O<sub>2</sub> and combined NAC and H<sub>2</sub>O<sub>2</sub> treatment. N = 3 experiments. \*\*\*\*,  $p < 0.0001$  based on one-way ANOVA with Tukey's multiple comparison test. Data in this figure are presented as mean + S.E.M.

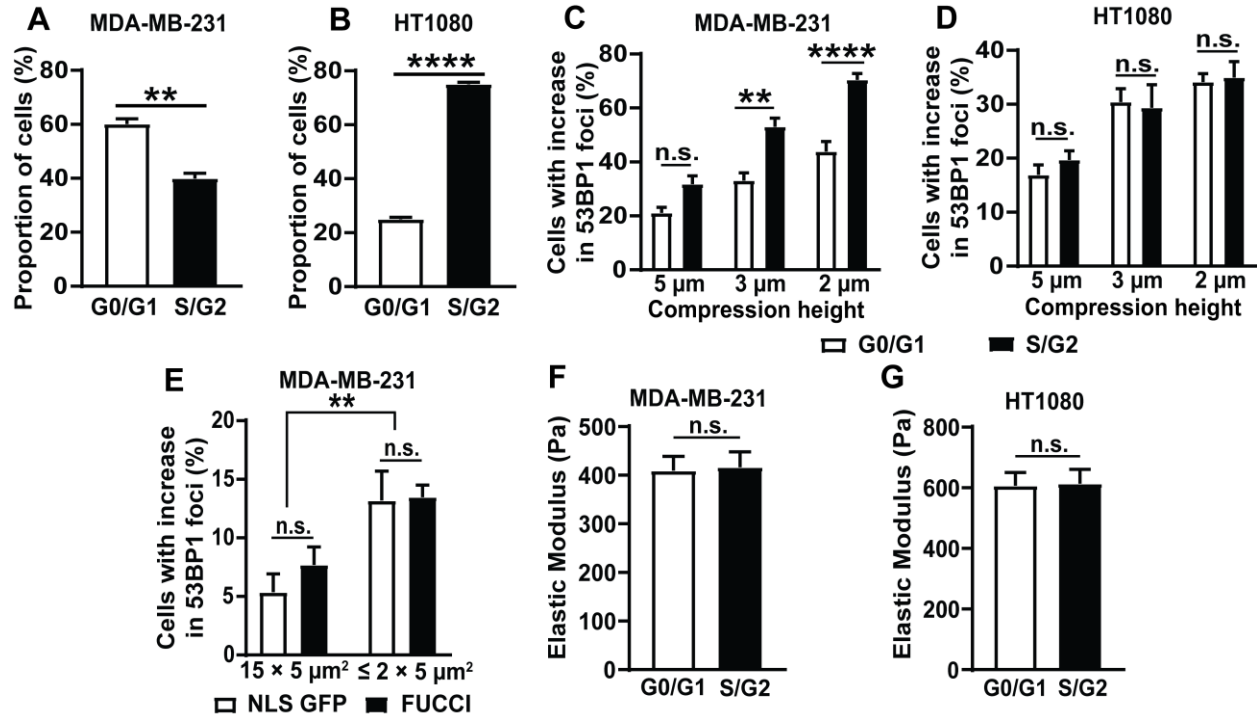

**Figure S5: Cell cycle stage analysis by DNA content assay and during nuclear compression. Related to Figure 3. (A)** Proportion of MDA-MB-231 cells in G0/G1 phase or S/G2 phase of the cell cycle, determined by DNA content assay. \*\*,  $p < 0.01$  based on unpaired  $t$ -test with Welch's correction. **(B)** Proportion of HT1080 cells in G0/G1 phase or S/G2 phase of the cell cycle, determined by DNA content assay. \*\*\*\*,  $p < 0.0001$  based on unpaired  $t$ -test with Welch's correction. **(C)** Percentage of MDA-MB-231 cells with new DNA damage (53BP1-mCherry foci) in G0/G1 or S/G2 phase of the cell cycle during compression to either 5  $\mu$ m ( $n = 574$  cells), 3  $\mu$ m ( $n = 359$  cells), or 2  $\mu$ m ( $n = 522$  cells) height. \*\*,  $p < 0.01$ ; \*\*\*\*,  $p < 0.0001$  based on two-way ANOVA with Tukey's multiple comparison test. **(D)** Percentage of HT1080 cells with new DNA damage (53BP1-mCherry foci) in G0/G1 or S/G2 phase of the cell cycle during compression to either 5  $\mu$ m ( $n = 656$  cells), 3  $\mu$ m ( $n = 449$  cells) or 2  $\mu$ m ( $n = 672$  cells) height. Differences were not statistically significant based on two-way ANOVA. **(E)** Percentage of MDA-MB-231 cells expressing NLS-GFP or FUCCI reporter with new DNA damage (53BP1-mCherry foci) during migration through small  $\leq 2 \times 5 \mu$ m<sup>2</sup> constrictions ( $n = 381$  for NLS-GFP cells and  $n = 327$  for FUCCI cells) or  $15 \times 5 \mu$ m<sup>2</sup> control channels ( $n = 196$  for NLS-GFP cells and  $n = 145$  for FUCCI cells). \*\*,  $p < 0.01$  based on two-way ANOVA with Tukey's multiple comparison test. **(F)** Nuclear elastic modulus, measured by AFM indentation with a spherical tip probe, for MDA-MB-231 cells in G0/G1 ( $n = 50$  cells) or S/G2 ( $n = 50$  cells) phase of cell cycle. Cell cycle phase was determined based on the FUCCI reporter expressed in these cells. Differences were not statistically significant based on unpaired  $t$ -test with Welch's correction. **(G)** Nuclear bulk elastic modulus for HT1080 cells in G0/G1 ( $n = 51$  cells) or S/G2 ( $n = 51$  cells) phase of cell cycle. Differences were not statistically significant based on unpaired  $t$ -test with Welch's correction. Data in this figure are presented as mean + S.E.M.

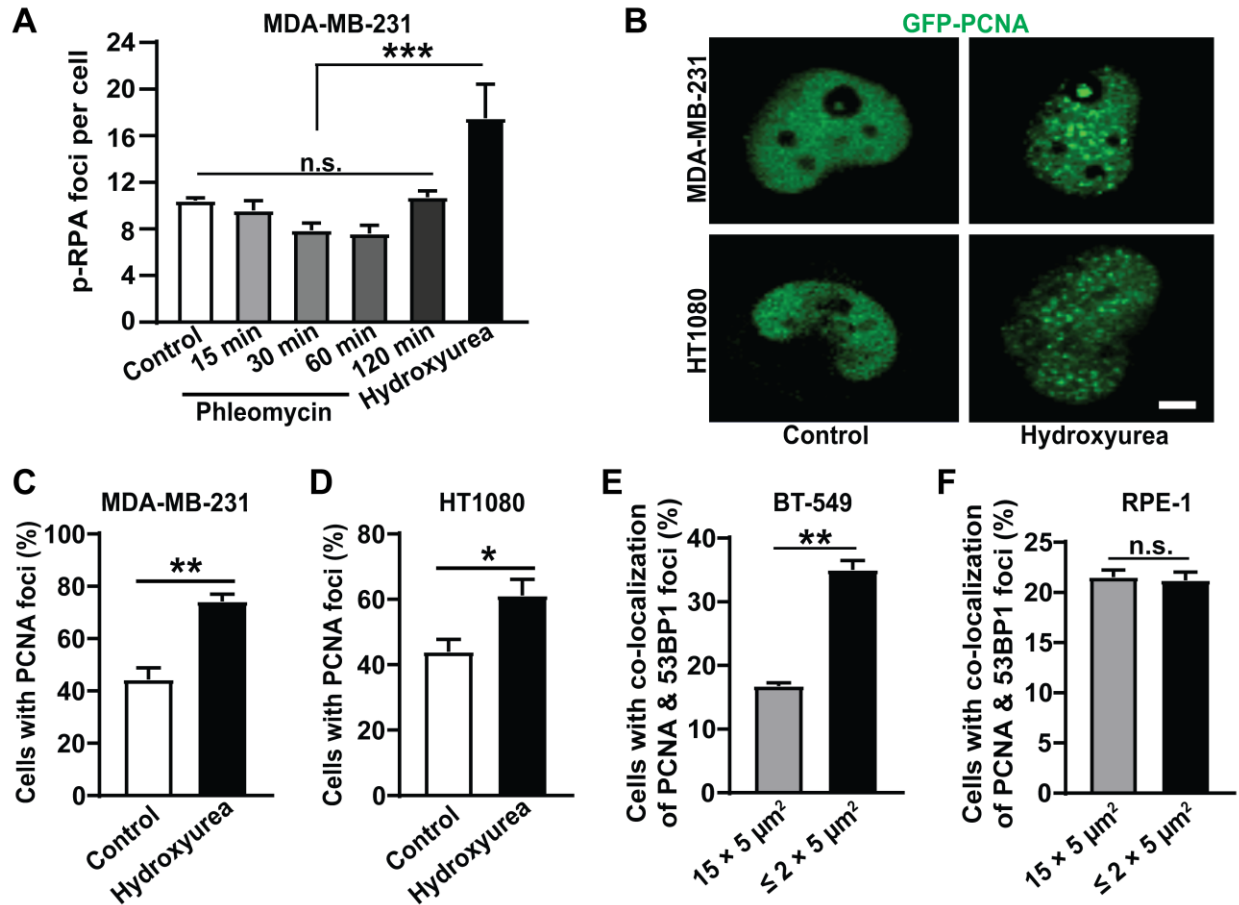

**Figure S6: GFP-PCNA construct validation and replication stress experiments. Related to Figure 4. (A)** Average number of p-RPA S33 foci in MDA-MB-231 untreated control cells ( $n = 235$  cells) or following treatment with Phleomycin for 15 minutes ( $n = 201$  cells), 30 minutes ( $n = 195$  cells), 60 minutes ( $n = 187$  cells), or 120 minutes ( $n = 191$  cells). Hydroxyurea treatment (120 minutes) was used as a positive control for replication stress ( $n = 158$  cells). \*\*\*,  $p < 0.001$  based on one-way ANOVA with Tukey's multiple comparison test. **(B)** Representative image sequence of MDA-MB-231 and HT1080 cells expressing GFP-PCNA, showing an increase in GFP-PCNA foci, indicating stalled replication forks, following treatment with hydroxyurea. Scale bar:  $5 \mu\text{m}$ . **(C)** Percentage of MDA-MB-231 cells with GFP-PCNA foci following hydroxyurea treatment or vehicle control.  $n = 147$  cells for control;  $n = 163$  cells for hydroxyurea treatment; \*\*,  $p < 0.01$  based on unpaired  $t$ -test with Welch's correction. **(D)** Percentage of MDA-MB-231 cells with GFP-PCNA foci following hydroxyurea treatment or vehicle control.  $n = 132$  cells for control;  $n = 143$  cells for hydroxyurea treatment; \*,  $p < 0.05$  based on unpaired  $t$ -test with Welch's correction. **(E)** Percentage of BT-549 breast cancer cells with co-localization between new DNA damage (53BP1-mCherry foci) and replication forks (GFP-PCNA foci) during migration through small ( $\leq 2 \times 5 \mu\text{m}^2$ ) constrictions ( $n = 154$  cells) or  $15 \times 5 \mu\text{m}^2$  control channels ( $n = 106$  cells). \*\*,  $p < 0.01$  based on unpaired  $t$ -test with Welch's correction. **(F)** Percentage of RPE-1

retinal epithelial cells with co-localization between new DNA damage (53BP1-mCherry foci) and replication forks (GFP-PCNA foci) during migration through small ( $\leq 2 \times 5 \mu\text{m}^2$ ) constrictions ( $n = 249$  cells) or  $15 \times 5 \mu\text{m}^2$  control channels ( $n = 126$  cells). Differences were not statistically significant based on unpaired  $t$ -test. Data in this figure are presented as mean + S.E.M.
